# Supplementary material
Source: HighWire-hosted journal article supplement (https://www.annfammed.org/highwire/filestream/14896/field_highwire_adjunct_files/0/SinghSuppTable.pdf)
Supplement: SinghSuppTable.pdf [file SinghSuppTable.pdf]

## Supplemental material for

Singh J, Garber GE, Keely E, Guglani S, Liddy C. Evaluation of an electronic consultation service for COVID-19 Care. *Ann Fam Med*. 2022;20(3):220-226.

### Supplemental Table 1

Supplemental Table 1. Close-Out Survey Questions on the Ontario eConsult Service and Champlain eConsult BASE™<sup>1</sup>

|                                                                                                  |                                                                                                                                                                                                                                                                                                                                                                                                                                                                                                     |
|--------------------------------------------------------------------------------------------------|-----------------------------------------------------------------------------------------------------------------------------------------------------------------------------------------------------------------------------------------------------------------------------------------------------------------------------------------------------------------------------------------------------------------------------------------------------------------------------------------------------|
| Question 1: Which of the following best describes the outcome of this eConsult for your patient: | <ol style="list-style-type: none"><li>1. I was able to confirm a course of action that I originally had in mind</li><li>2. I got good advice for a new or additional course of action</li><li>3. I got clear advice for a new or additional course of action that I am not able to implement*</li><li>3. I did not find the response very useful+</li><li>4. None of the above (please comment)</li></ol>                                                                                           |
| Question 2: As a result of this eConsult would you say that:                                     | <ol style="list-style-type: none"><li>1. Referral was originally contemplated but now avoided at this stage</li><li>2. Referral was originally contemplated and is still needed</li><li>3. Referral was not originally contemplated and is still not needed</li><li>4. Referral was not originally contemplated, but eConsult process resulted in a referral being initiated</li><li>5. There was no particular benefit to using eConsult in this case+</li><li>6. Other (please comment)</li></ol> |
| Question 3: We would value any additional feedback you provided on the system/application:       | Comment Box                                                                                                                                                                                                                                                                                                                                                                                                                                                                                         |

\*Survey option only available on Champlain eConsult BASE™ +Survey option only available on Ontario eConsult Service.

1. Additional survey questions that are exclusively on the Champlain eConsult BASE™ service were not included in the analysis.
